# Supplementary material for: An Evolutionarily Conserved Sexual Signature in the Primate Brain
Source: PLoS Genet. 2008 Jun 20;4(6):e1000100. doi: 10.1371/journal.pgen.1000100 (PMC2413013; doi:10.1371/journal.pgen.1000100)
Supplement: Table S2 — qPCR primers. (0.05 MB PDF) [file pgen.1000100.s005.pdf]

| Primer Name   | Sequence (5' to 3')                |
|---------------|------------------------------------|
| ATCB Forw.    | GGC ATC CAC GAA ACT ACC T          |
| ATCB Rev.     | CAA GAA AGG GTG TAA CGC AAC        |
| FGF12 Forw.   | TGG TTT CTG GGA CTC AAT AAA GA     |
| FGF12 Rev.    | TGA ACG CCC TTG TTT TTC TC         |
| NKIRAS1 Forw. | CAG TTA CAT CTT TAT GAC ACC AGA GG |
| NKIRAS1 Rev.  | CCA CTT CAG CGT CCA CTT G          |
| AOF1 Forw.    | GCG TGC TGA TGT CTG TGA TT         |
| AOF1 Rev.     | CCC CAC TTC CAC CTG TCT T          |
| SLC6A1 Forw.  | CCC CTA TCT CTG CGG GAA AA         |
| SLC6A1 Rev.   | CCA CGC CCT TGA ACA TAG GA         |
| EPHX1 Forw.   | TCA GAT GAG GAG ATC CAC GA         |
| EPHX1 Rev.    | TCC GCC AGT AGG AGA TGA CT         |
| MAP1A Forw.   | GCT GCC GCC TCC ATG A              |
| MAP1A Rev.    | CCA GGA TGA TGG TCT CTA GGA TCT    |

**Table S2. qPCR primers.**

The table contains the primer sequences used in the qPCR experiments.
